# Supplementary material for: Superhydrophilic mesoporous sulfonated melamine–formaldehyde resin supported palladium nanoparticles as an efficient catalyst for biofuel upgrade
Source: Royal Society of Chemistry journal article supplement (doi:10.1039/c3ta10916j), 2013-01-01
Supplement: c3ta10916j.pdf [file c3ta10916j.pdf]

**Superhydrophilic mesoporous sulfonated  
melamine-formaldehyde resins supported palladium  
nanoparticles as an efficient catalyst for biofuel upgrade**

Zhongfei Lv,<sup>a</sup> Qi Sun,<sup>a</sup> Xiangju Meng<sup>\*a</sup> and Feng-Shou Xiao <sup>\*a,b</sup>

**Supplementary Tables.**

**Table S1** Textural parameters of various samples.

| Sample                            | BET<br>(m <sup>2</sup> /g) | BJH<br>pore size<br>(nm) | Pore<br>volume<br>(m <sup>3</sup> /g) | Micropore<br>BET<br>area (m <sup>2</sup> /g) |
|-----------------------------------|----------------------------|--------------------------|---------------------------------------|----------------------------------------------|
| MSMF                              | 256                        | 10.2                     | 0.50                                  | 20                                           |
| Pd/MSMF                           | 197                        | 11.2                     | 0.42                                  | 26                                           |
| Pd/MMF                            | 188                        | ----                     | 0.74                                  | 16                                           |
| Pd/TiO <sub>2</sub>               | 5.6                        | ----                     | ----                                  | ----                                         |
| Pd/Al <sub>2</sub> O <sub>3</sub> | 158                        | 3.8                      | 0.52                                  | 24                                           |
| Pd/C                              | 1062                       | ----                     | 0.72                                  | 185                                          |

**Table S2** Molar ratio of C/H/N/S of MSMF by elemental analysis.

| Element     | C    | H    | N    | S    |
|-------------|------|------|------|------|
| Molar ratio | 1.00 | 2.13 | 1.16 | 0.12 |

**Table S3** Molar ratio of C/N/O/S of MSMF by XPS analysis.

| Element     | C    | N    | O    | S     |
|-------------|------|------|------|-------|
| Molar ratio | 1.00 | 1.34 | 0.47 | 0.095 |

**Table S4** Catalytic data in hydrodeoxygenation of vanillin over Pd/MSMF catalyst under various H<sub>2</sub> pressure.<sup>a</sup>

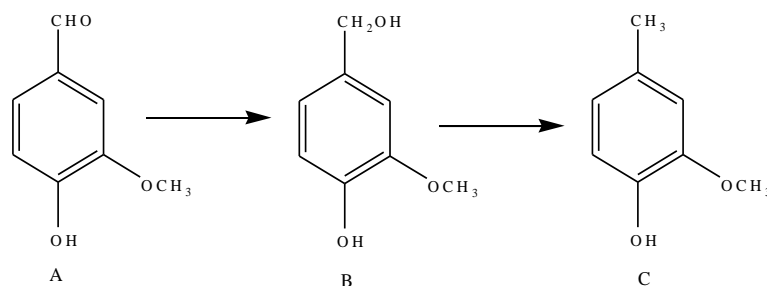

| Entry | Pressure (MPa) | Conv. (%) | Sel. (%) |      |
|-------|----------------|-----------|----------|------|
|       |                |           | B        | C    |
| 1     | 0.5            | >99.5     | 45.8     | 54.2 |
| 2     | 1              | >99.5     | 37.8     | 62.2 |
| 3     | 1.5            | >99.5     | 33.3     | 66.7 |
| 4     | 2              | >99.5     | 32.2     | 67.8 |
| 5     | 3              | >99.5     | 29.9     | 70.1 |

<sup>a</sup> Reaction conditions: 2 mmol of vanillin, S/C ratio at 200, 20 mL of water, temperature at 100°C, reaction for 1 h, Pd loading at 4.5 wt.%.

**Table S5** Catalytic data in hydrodeoxygenation of vanillin over Pd/MSMF catalyst at various temperature.<sup>a</sup>

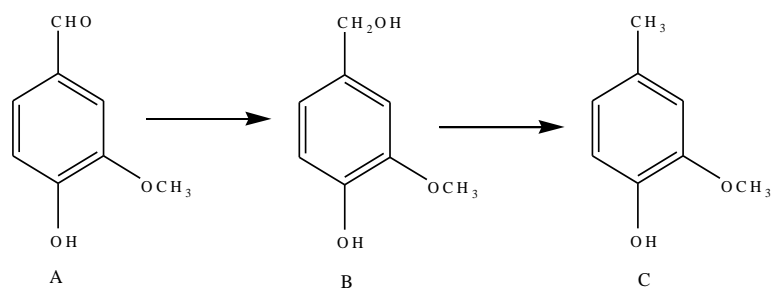

| Entry | Temperature (°C) | Conv. (%) | Sel. (%) |       |
|-------|------------------|-----------|----------|-------|
|       |                  |           | B        | C     |
| 1     | 90               | >99.5     | 46.4     | 53.6  |
| 2     | 100              | >99.5     | 37.8     | 62.2  |
| 3     | 110              | >99.5     | 23.4     | 76.6  |
| 4     | 120              | >99.5     | 13.8     | 86.2  |
| 5     | 130              | >99.5     | 3        | 97    |
| 6     | 150              | >99.5     | ----     | >99.5 |

<sup>a</sup> Reaction conditions: 2 mmol of vanillin, S/C ratio at 200, 20 mL of water, pressure at 1 MPa, reaction for 1 h, Pd loading at 4.5 wt.%.

**Table S6** Catalytic data in hydrodeoxygenation of vanillin over Pd/MSMF catalyst under various recycles.<sup>a</sup>

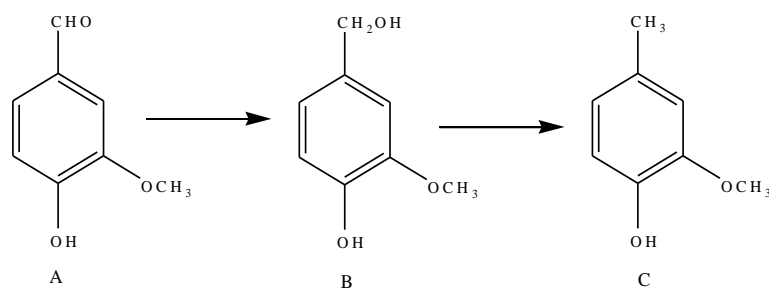

| Entry | Conv. (%) | Sel. (%) |
|-------|-----------|----------|
| 1     | >99.5     | >99.5    |
| 2     | >99.5     | >99.5    |
| 3     | >99.5     | 93       |
| 4     | >99.5     | 94       |
| 5     | >99.5     | 98       |
| 6     | >99.5     | 87       |

<sup>a</sup> Reaction conditions: 2 mmol of vanillin, S/C ratio at 200, 20 mL of water, temperature at 110 °C, pressure at 1 MPa, reaction for 2 h, Pd loading at 4.5 wt.%.

## Supplementary Figure Captions

**Figure S1.** A photograph of MSMF.

**Figure S2.** SEM image of MSMF.

**Figure S3.** HRTEM image of Pd/MSMF.

**Figure S4.** Contact angle of a (A) water and (B) 2-methoxy-4-methylphenol droplet on the surface of MSMF.

**Figure S5.** Pd3d XPS spectra of (a) Pd/C and (b) Pd/MSMF.

**Figure S6.** Dependence of conversion and selectivity in hydrodeoxygenation of vanillin on the H<sub>2</sub> pressure over Pd/MSMF catalyst at temperature of 100 °C in 20 mL of water as a solvent and 2 mmol of vanillin as a substrate for 1 h with S/C ratio of 200 and Pd loading at 4.5 wt.%.

**Figure S7.** Dependence of conversion and selectivity in hydrodeoxygenation of vanillin on the temperature over Pd/MSMF catalyst under H<sub>2</sub> pressure of 1 MPa in 20 mL of water as a solvent and 2 mmol of vanillin as a substrate for 1 h with S/C ratio of 200 and Pd loading at 4.5 wt.%.

**Figure S8.** TEM image of Pd/C.

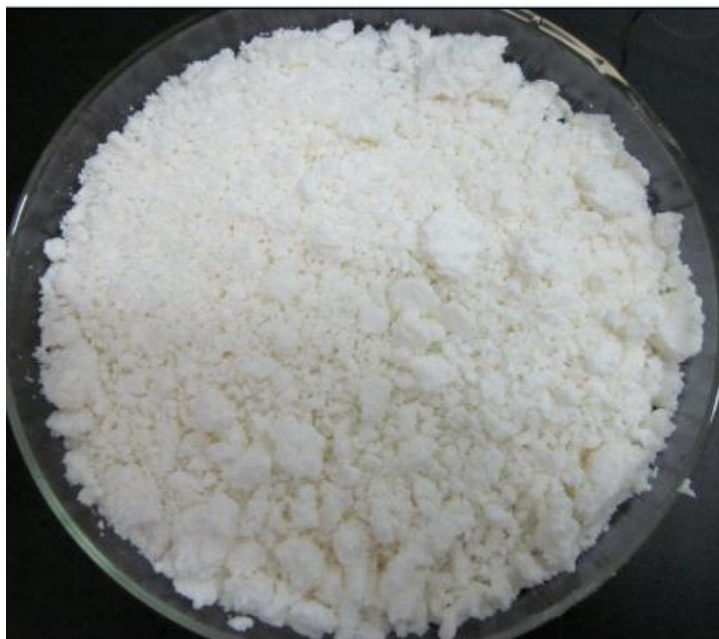

*Figure S1*

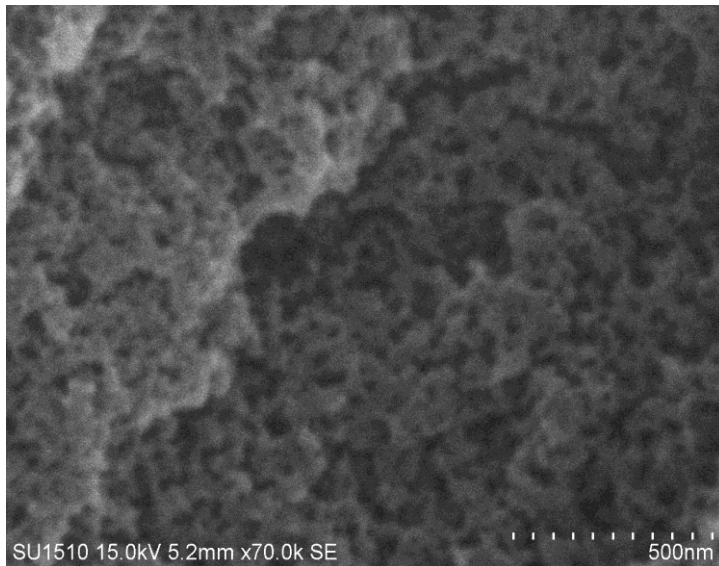

*Figure S2*

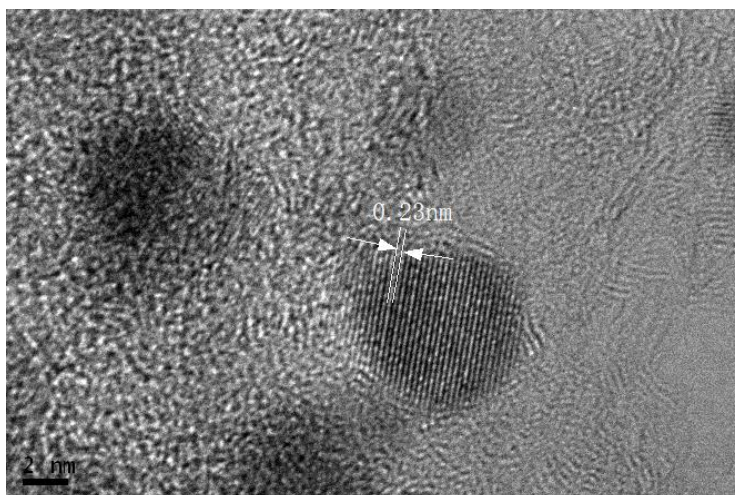

*Figure S3*

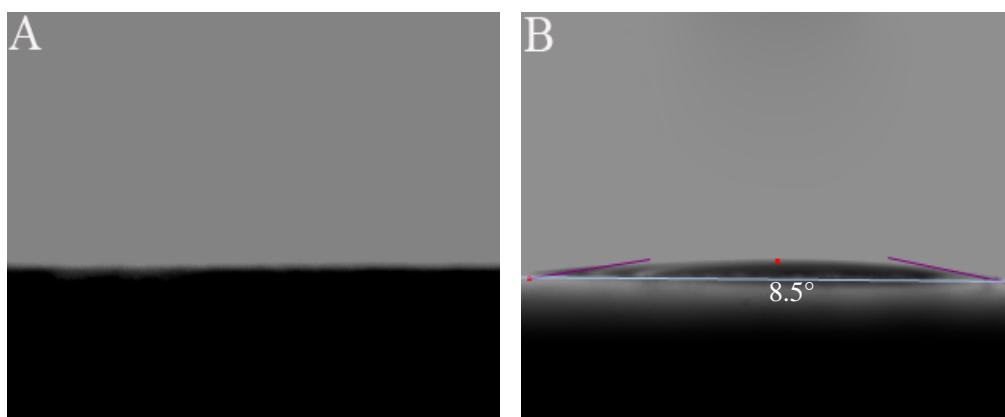

*Figure S4.*



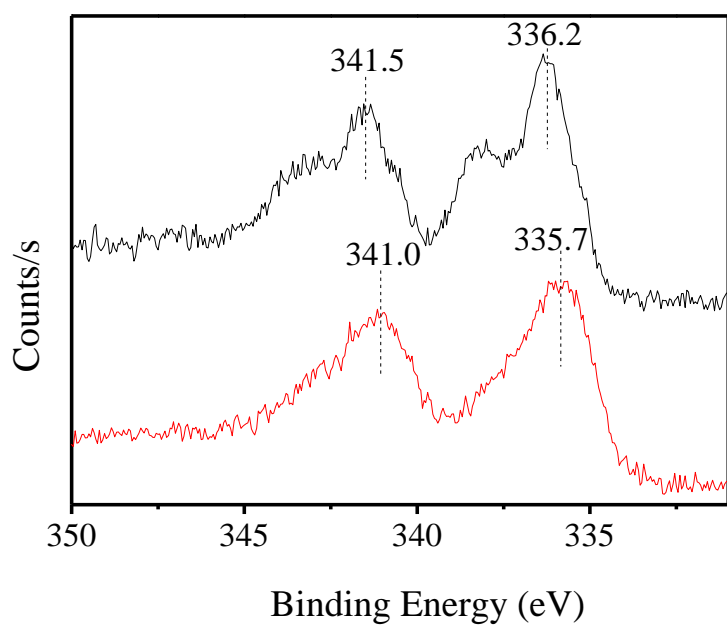

*Figure S5.*

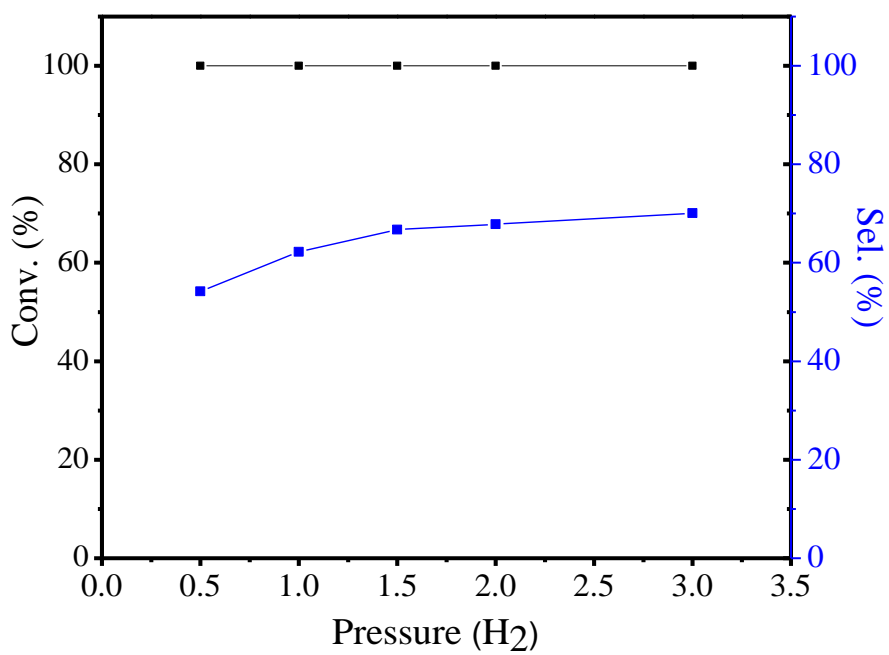

*Figure S6.*

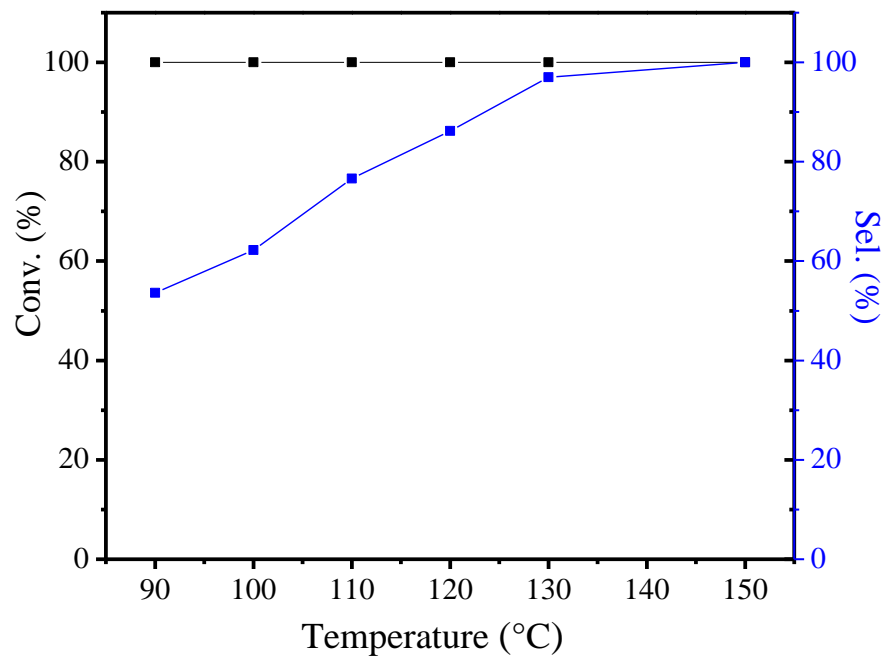

*Figure S7.*

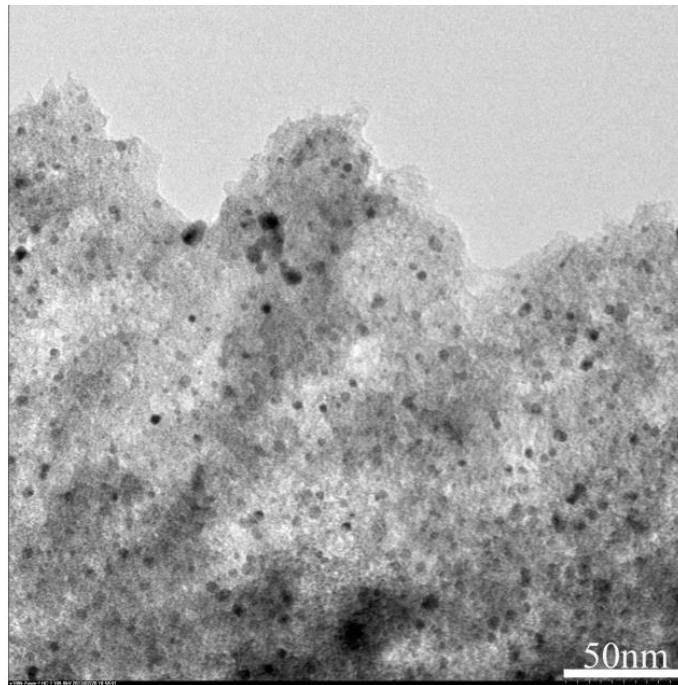

*Figure S8.*
